# Supplementary material for: The HIRLAM fast radiation scheme for mesoscale numerical weather prediction models
Source: Copernicus journal article supplement (doi:10.5194/asr-14-195-2017), 2017-07-07
Supplement: Supplementary file 2 [file asr-14-195-2017-supplement.zip]

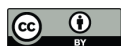

## *Supplement of*

# **The HIRLAM fast radiation scheme for mesoscale numerical weather prediction models**

**Laura Rontu et al.**

*Correspondence to:* Laura Rontu ([laura.rontu@fmi.fi](mailto:laura.rontu@fmi.fi))

- [asr-14-195-2017-supplement-title-page.pdf](#)
- [Report 49.pdf](#)
- [joksod\\_2006-2016\\_dat.zip](#)

The copyright of individual parts of the supplement might differ from the CC BY 3.0 License.
